# Supplementary material for: Long-term starvation and ageing induce AGE-1/PI 3-kinase-dependent translocation of DAF-16/FOXO to the cytoplasm
Source: PubMed Central journal article supplement (PMC1403811; doi:10.1186/1741-7007-4-1), 2006-02-03

○ egg/embryo

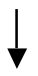

L1

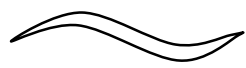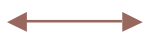

L1 diapause

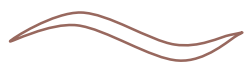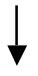

L2

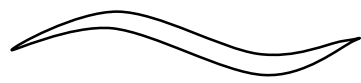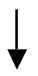

L3

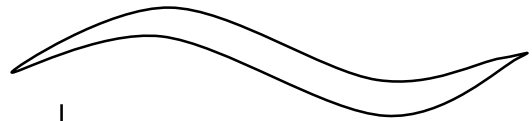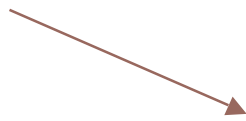

dauer diapause

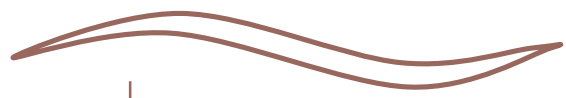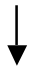

L4

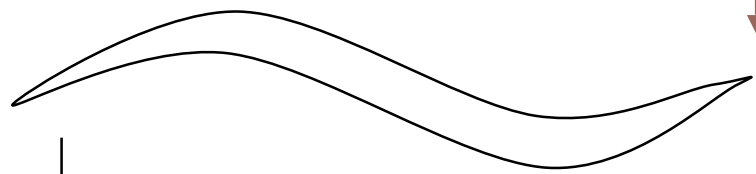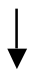

adult

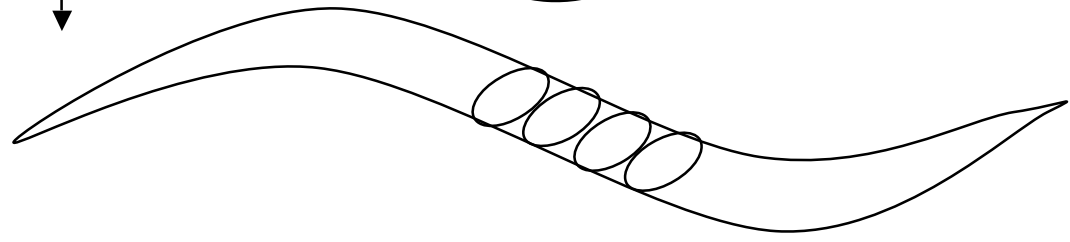

Supplement: 1741-7007-4-1-S1.pdf [file 1741-7007-4-1-S1.pdf]
